# Supplementary material for: Sustainable and cost-effective ternary electrolyte Et3NHCl–AlCl3–Mg(DEP)2 for high-performance rechargeable magnesium batteries
Source: Royal Society of Chemistry journal article supplement (doi:10.1039/d1cp04794a), 2021-12-21
Supplement: d1cp04794a1.pdf [file d1cp04794a1.pdf]

## Supporting Information

### Sustainable and Cost-Effective Ternary Electrolyte Et<sub>3</sub>NHCl-AlCl<sub>3</sub>-Mg(DEP)<sub>2</sub> for High-Performance Rechargeable Magnesium Batteries

Seggem Prabhakar<sup>a,b</sup>, Santosh N. Chavan<sup>a</sup>, Pratyay Basak<sup>a</sup>, Jetti Vatsala Rani<sup>a,\*</sup>

- a) Polymers and Functional Materials, CSIR-Indian Institute of Chemical Technology, Hyderabad-500007, India.  
b) Academy of Scientific and Innovative Research (AcSIR), Ghaziabad-201002, India

**Table S1.** Anodic and cathodic current in the peak of Mg dissolution and deposition

| Molar concentration        | Anodic current | Cathodic current |
|----------------------------|----------------|------------------|
| 0.1 M Mg(DEP) <sub>2</sub> | 430 μm         | 600 μm           |
| 0.2 M Mg(DEP) <sub>2</sub> | 180 μm         | 260 μm           |
| 0.3 M Mg(DEP) <sub>2</sub> | 85 μm          | 85 μm            |

**Table S2.** Arrhenius fitting parameters of conductivity in different concentration of Mg salt in Et<sub>3</sub>NHCl-AlCl<sub>3</sub> eutectic mixture electrolytes

| Electrolytes | Conductivity (S cm <sup>-1</sup> ) | Activation Energy (eV) | R <sup>2</sup> |
|--------------|------------------------------------|------------------------|----------------|
| 1            | 4.5 × 10 <sup>-3</sup>             | 0.23                   | 0.998          |
| 2            | 2.7 × 10 <sup>-3</sup>             | 0.27                   | 0.995          |
| 3            | 1.1 × 10 <sup>-3</sup>             | 0.28                   | 0.923          |

**Table S3.** Temperature dependence of ionic conductivity and fitting in VTF equation:<sup>1</sup>

| $\sigma = \sigma_0 e^{-\frac{B}{T-T_0}}$ |            |          |                    |                |
|------------------------------------------|------------|----------|--------------------|----------------|
| Electrolytes                             | $\sigma_0$ | B (K)    | T <sub>0</sub> (K) | R <sup>2</sup> |
| 1                                        | 1.08345    | 826.2541 | 145.9243           | 0.99935        |
| 2                                        | 39.98513   | 3187.621 | 42.31714           | 0.99753        |
| 3                                        | 3.51201    | 1637.95  | 88.06223           | 0.98752        |

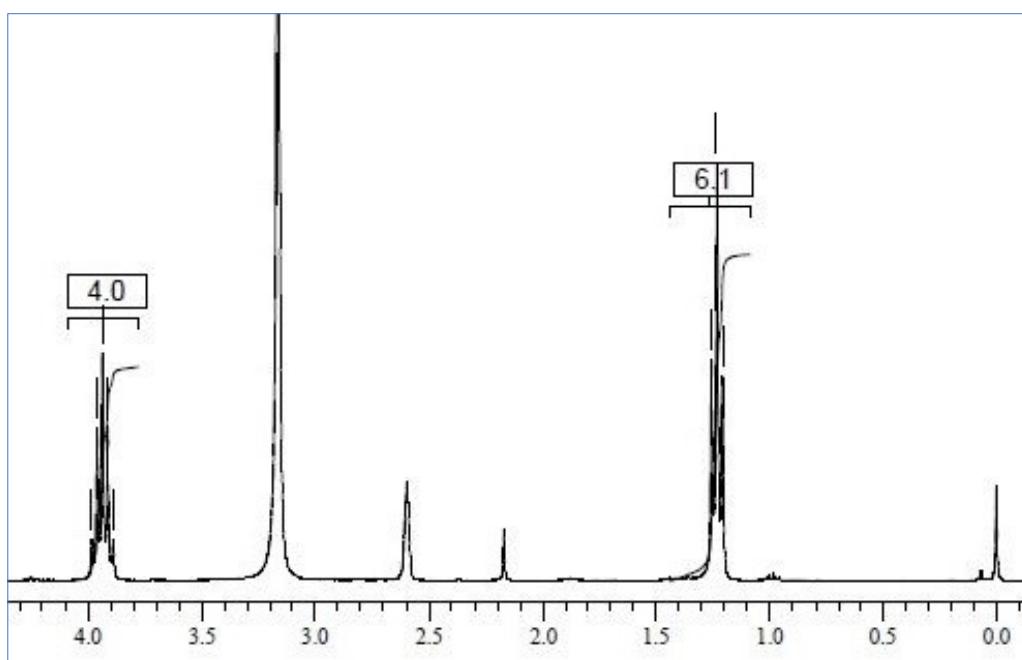

**Figure S1.**  $^1\text{H}$  NMR of Magnesium Diethylphosphate ( $\text{Mg}(\text{DEP})_2$  salt in  $\text{CDCl}_3$

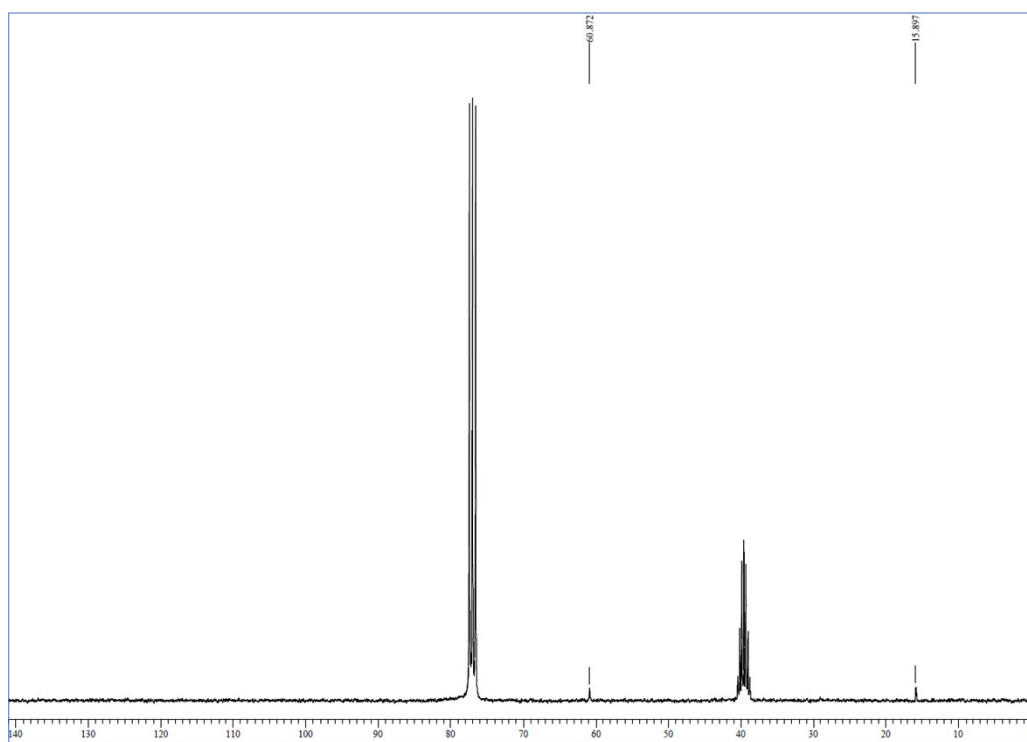

**Figure S2.**  $^{13}\text{C}$  NMR of Magnesium Diethylphosphate ( $\text{Mg}(\text{DEP})_2$  salt in  $\text{CDCl}_3$

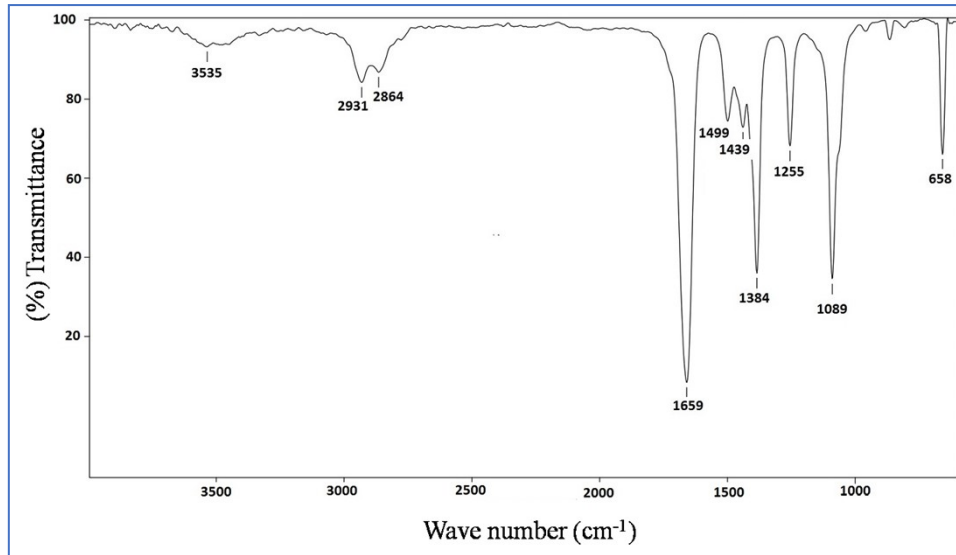

**Figure S3.** IR spectra of Magnesium Diethyl phosphate ( $\text{Mg}(\text{DEP})_2$ ) in DMF salt in  $\text{CDCl}_3$ .

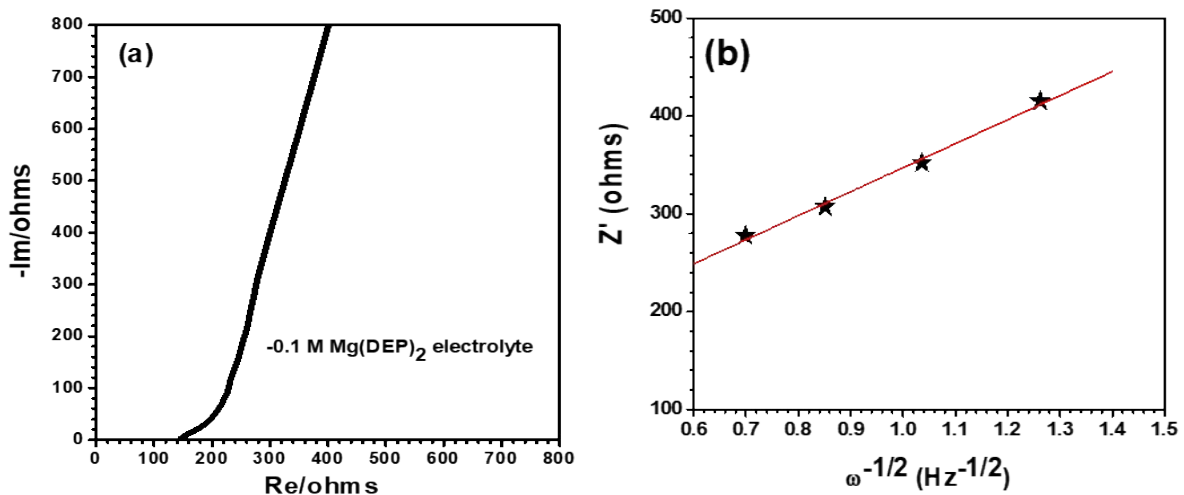

**Figure S4:** Diffusion coefficient<sup>2,3</sup> is calculated from Electrochemical Impedance Spectroscopy (EIS) on (a) Mg/1/Graphite (b) linear fitting of  $Z'$  Vs  $\omega^{-1/2}$ .

$$D = \frac{R^2 T^2}{2A^2 n^4 F^4 C^2 \sigma^2}$$

$D$  is ion diffusion coefficient,

$R$  is molar gas constant ( $8.314 \text{ J mol}^{-1} \text{ K}^{-1}$ ),

$T$  is absolute temperature (298 k),

$A$  is electrode area ( $0.32 \text{ cm}^2$ ),

$n$  is electron transfer number (2),

F is Faraday constant (96500 C mol<sup>-1</sup>)

C is the concentration of ion (0.1 M).

$\sigma$  is Warburg factor, calculated by the formula:  $Z^{\wedge'} = R_{\Omega} + R_{ct} + \sigma \omega^{(-1/2)}$

( $Z'$ ,  $R_{\Omega}$ ,  $R_{ct}$  and  $\omega$  represent true resistance, Ohm solution impedance, charge transfer impedance and the frequency at low frequency region, respectively.)

Mg<sup>2+</sup> ions diffusion coefficient (**D**)= **3.15 x 10<sup>-17</sup> cm<sup>2</sup>s<sup>-1</sup>**

### References:

1. H. Tokuda, K. Hayamizu, K. Ishii, M. A. B. H. Susan and M. Watanabe, *J. Phys. Chem. B*, 2004, **108**, 16593-16600.
2. S. Miyoshi, T. Akbay, T. Kurihara, T. Fukuda, A. T. Staykov, S. Ida and T. Ishihara, *J. Phys. Chem. C*, 2016, **120**, 22887-22894.
3. J. Vila, P. Ginés, J. M. Pico, C. Franjo, E. Jiménez, L. M. Varela and O. Cabeza, *Fluid Phase Equilib.*, 2006, **242**, 141-146.
